# Supplementary material for: PGC-1α Promotes Ureagenesis in Mouse Periportal Hepatocytes through SIRT3 and SIRT5 in Response to Glucagon
Source: PubMed Central journal article supplement (PMC4823758; doi:10.1038/srep24156), 2016-04-07
Supplement: srep24156-s1.pdf [file srep24156-s1.pdf]

## **Supplementary information**

# **PGC-1 $\alpha$ Promotes Ureagenesis in Mouse Periportal Hepatocytes through SIRT3 and SIRT5 in Response to Glucagon**

**Lulu Li, Ping Zhang, Zhengxi Bao, Tongxin Wang, Shuang Liu & Feiruo Huang\***

Department of Animal Nutrition and Feed Science, College of Animal Science and  
Technology, Huazhong Agricultural University, Wuhan 430070, China

\* Corresponding author:

Feiruo Huang, Postal address: Huazhong Agricultural University, No.1 Shizishan  
Street, Hongshan District, Wuhan 430070, China, Phone: 86-27-87286912, Fax:  
86-27-87280408, E-mail: [huangfeiruo@mail.hzau.edu.cn](mailto:huangfeiruo@mail.hzau.edu.cn)

## Supplementary Figures

**Table S1. qPCR Primer**

| Gene                            | Forward, 5'-3'           | Reverse, 5'-3'           | Reference             |
|---------------------------------|--------------------------|--------------------------|-----------------------|
| <i>OTC</i>                      | TCCTGCTCAACAAGGCAGCTCTTA | TCACGGCCTTTCAGCTGTACTTGA | Walters et al. (2010) |
| <i>CPS1</i>                     | TGAGACAGGCCAAAGAGATTGGGT | TGCTCCTGGCCATTGTAGGTAACA | Walters et al. (2010) |
| <i>Sirt3</i>                    | GCTGCTTCTGCGGCTCTATAC    | GAAGGACCTTCGACAGACCGT    | Kong et al. (2010)    |
| <i>Sirt5</i>                    | CTCCGGGCCGATTCATTTCC     | GCGTTCGCAAAACACTTCCG     | Buler et al. (2014)   |
| <i>PEPCK</i>                    | CATATGCTGATCCTGGGCATAAC  | CAAACCTCATCCAGGCAATGTC   | Lin et al. (2004)     |
| <i>G6Pase</i>                   | ACACCGACTACTACAGCAACAG   | CCTCGAAAGATAGCAAGAGTAG   | Lin et al. (2004)     |
| <i>PGC-1<math>\alpha</math></i> | GCAGGTCGAACGAAACTGAC     | CTCAGCCTGGGAACACGTTA     | Buler et al. (2014)   |
| <i>18S</i>                      | CGCCGCTAGAGGTGAAATTC     | CCAGTCGGCATCGTTTATGG     | Buler et al. (2014)   |

OTC, ornithine transcarbamoylase; CPS1, carbamoyl phosphate synthetase 1; Sirt3, sirtuin 3; Sirt5, sirtuin 5; PEPCK, phosphoenolpyruvate carboxykinase; G6Pase, glucose-6-phosphatase; PGC-1 $\alpha$ : peroxisome proliferator-activated receptor gamma coactivator 1-alpha; 18S, 18S ribosomal RNA.

### Supplemental References

1. Walters, M. W. & Wallace, K. B. Urea cycle gene expression is suppressed by PFOA treatment in rats. *Toxicol Lett* **197**, 46-50 (2010).
2. Kong, X. *et al.* Sirtuin 3, a new target of PGC-1alpha, plays an important role in the suppression of ROS and mitochondrial biogenesis. *PloS One* **5**, e11707 (2010).
3. Buler, M., Aatsinki, S. M., Izzi, V., Uusimaa, J. & Hakkola, J. SIRT5 is under the control of PGC-1 $\alpha$  and AMPK and is involved in regulation of mitochondrial energy metabolism. *FASEB J* **28**, 3225-3237(2014).

4. Lin, J. *et al.* Defects in adaptive energy metabolism with CNS-linked hyperactivity in PGC-1 $\alpha$  null mice. *Cell* **119**, 121-135 (2004).
